# Supplementary material for: Novel methods for epistasis detection in genome-wide association studies
Source: PubMed Central journal article supplement (PMC7703915; doi:10.1371/journal.pone.0242927), 2020-11-30
Supplement: pone.0242927.s001.pdf [file pone.0242927.s001.pdf]

# S1 File. Genotypic hidden Markov model

In this Appendix, we explicit the transition and emission probabilities for the genotypic hidden Markov model. For that purpose, we start by considering a pair of ordered haplotypes  $H^a = (H_1^a, \dots, H_p^a) \in \{0, 1\}^p$  and  $H^b = (H_1^b, \dots, H_p^b) \in \{0, 1\}^p$ . We recall that the two haplotypes correspond to the same positions. The hidden variables  $Z^a = (Z_1^a, \dots, Z_p^a)$  and  $Z^b = (Z_1^b, \dots, Z_p^b)$  represent cluster memberships. They take discrete values in  $\{1, \dots, K\}^p$ . Scheet and Stephens [1] define the clusters as a “(common) combination of alleles at tightly linked SNPs”. The underlying hidden Markov models for the two alleles have identical forms. We then focus on the first allele  $a$ . We follow the notations of [2].

The marginal distribution of the first hidden state can be written as:

$$q_1^{hap}(k) = \alpha_{1,k}, \quad k \in \{1, \dots, K\}.$$

For  $j \in \{2, \dots, p\}$ , the transition matrix  $Q_j^{hap}$  is given by:

$$Q_j^{hap}(k'|k) = P(H_j = k' | H_{j-1} = k) = \begin{cases} e^{-r_j} + (1 - e^{-r_j}) \alpha_{j,k'}, & k' = k \\ (1 - e^{-r_j}) \alpha_{j,k'}, & k' \neq k \end{cases}.$$

The parameter  $r = (r_2, \dots, r_p)$  can be assimilated to the recombination rate between loci  $j - 1$  and  $j$ , although Scheet and Stephens [1] point out the general mismatch between the observed recombination rates and the estimate of  $r$ . The parameter  $\alpha = (\alpha_{j,k})_{(j,k) \in \{1, \dots, p\} \times \{1, \dots, K\}}$  is the relative frequency of the cluster  $k$  in locus  $j$ .

Conditionally on the latent state  $Z_j^{hap} = z_j$ , the allele  $H_j$  is a Bernoulli random variable,  $H_j | Z_j \sim \mathcal{B}(\theta_{j,z_j})$ .  $\theta_{j,z_j}$  is the frequency of allele 1 in cluster  $z_j$  at the position  $j$ :

$$f_j^{hap} = (h_j; z_j, \theta) = \begin{cases} 1 - \theta_{j,z_j}, & h_j = 0 \\ \theta_{j,z_j}, & h_j = 1 \end{cases}.$$

Under the Hardy-Weinberg equilibrium (HWE), a third hidden Markov model for the unphased genotype can be derived by combining the HMMs of the two alleles  $a$  and  $b$ . The emission states  $X = (X_1, \dots, X_p) \in \{0, 1, 2\}^p$  are given by the sum of the emission states,  $H^a + H^b = (H_1^a + H_1^b, \dots, H_p^a + H_p^b)$ . Because of the phase indetermination, the latent states are unordered pairs of haplotype latent states,  $Z = (\{Z_1^a, Z_1^b\}, \dots, \{Z_p^a, Z_p^b\})$ . Thus, the dimensionality of the latent variable space is  $K(K + 1)/2$ . The different probabilities of the genotype model are computed by considering the two cases:  $Z_j^a = Z_j^b$  and  $Z_j^a \neq Z_j^b$ .

The initial latent state distribution is given by:

$$q_1^{gen}(\{k^a, k^b\}) = \begin{cases} (\alpha_{1,k^a})^2, & k^a = k^b \\ 2\alpha_{1,k^a}\alpha_{1,k^b}, & k^a \neq k^b \end{cases}.$$

In a similar fashion, the transition probabilities:

$$Q_j^{gen}(\{\underline{k}^a, \underline{k}^b\}|\{k^a, k^b\}) = \begin{cases} Q_j^{hap}(\underline{k}^a|k^a)Q_j^{hap}(\underline{k}^b|k^b) + Q_j^{hap}(\underline{k}^b|k^a)Q_j^{hap}(\underline{k}^a|k^b), & \underline{k}^a \neq \underline{k}^b \\ Q_j^{hap}(\underline{k}^a|k^a)Q_j^{hap}(\underline{k}^b|k^b), & \text{otherwise} \end{cases}$$

and, the emission probabilities are

$$f_j(x_j; \{k^a, k^b\}, \theta) = \begin{cases} (1 - \theta_{j,k^a})(1 - \theta_{j,k^b}), & x_j = 0 \\ \theta_{j,k^a}(1 - \theta_{j,k^b}) + (1 - \theta_{j,k^a})\theta_{j,k^b}, & x_j = 1 \\ \theta_{j,k^a}\theta_{j,k^b}, & x_j = 2 \end{cases}$$

For the estimate of the parameters  $\nu = (\alpha, r, \theta)$ , we use the imputation software fastPHASE [1] which fits the hidden Markov model using an expectation-maximization (EM) algorithm [3]. Its computational complexity is  $\mathcal{O}(npK^2)$ . The complexity scales linearly for both  $p$  and  $n$ , rendering fastPHASE well-suited for real case-control datasets where the number of SNPs is typically in the hundreds of thousands and the number of samples in the thousands. In practice, as a trade-off between a rich representation of the clusters and the ensuing quadratic complexity, we chose  $K = 12$ .

## References

1. Scheet P, Stephens M. A fast and flexible statistical model for large-scale population genotype data: applications to inferring missing genotypes and haplotypic phase. *American journal of human genetics*. 2006;78(4):629–44. doi:10.1086/502802.
2. Sesia M, Sabatti C, Candès EJ. Gene hunting with hidden Markov model knockoffs. *Biometrika*. 2018;doi:10.1093/biomet/asy033.
3. Dempster AP, Laird NM, Rubin DB. Maximum Likelihood from Incomplete Data via the EM Algorithm. *Journal of the Royal Statistical Society Series B (Methodological)*. 1977;39(1):1–38.
